# Supplementary material for: Efficacy and Safety of Cannabidiol Plus Standard Care vs Standard Care Alone for the Treatment of Emotional Exhaustion and Burnout Among Frontline Health Care Workers During the COVID-19 Pandemic: A Randomized Clinical Trial
Source: PubMed Central journal article supplement (PMC8363917; doi:10.1001/jamanetworkopen.2021.20603), 2021-08-13
Supplement: jamanetwopen-e2120603-s001.pdf [file jamanetwopen-e2120603-s001.pdf]

# Supplement

## 1. Trial protocol

**PROTOCOL VERSION 4.2, 05/27/21**

**ClinicalTrials.gov Identifier: NCT04504877**

**Project Title:**

**Burnout and Distress preventiOn With caNnabidiol in Front-line Health CareworkerS  
deAling with COVID-19**

**Short title: BONSAI Study**

**Principal Investigator:**

Prof José Alexandre de Souza Crippa - Full Professor - Psychiatry, University of São Paulo

**Co-Investigators:**

Prof Antonio W. Zuardi

Prof Francisco S. Guimarães

Prof Flávia de Lima Osório

Prof Aline Cristina Campos

Prof Sonia Regina Loureiro

Prof Rafael Guimarães dos Santos

Dr José Diogo dos Santos Souza

Dr Juliana Mayumi

Julia Cozar Pacheco

Prof Raphael Mechoulam

Prof Flávio Kapczinski

Prof Benedito AL Fonseca

Danillo LA Esposito

Karina Pereira-Lima

Prof Srijan Sem

Maristela Haddad Andraus

Prof Jaime E. C. Hallak

**Main study centres**

Department of Neuroscience and Behavior

Division of Psychiatry

Ribeirão Preto Medical School

University of São Paulo

Ribeirão Preto

Brazil

14049-900

Department of Pharmacology

Ribeirão Preto Medical School

University of São Paulo

Ribeirão Preto, Brazil

The Institute for Drug Research

School of Pharmacy

The Hebrew University of Jerusalem

Jerusalem, Israel.

Department of Internal Medicine

Ribeirão Preto Medical School

University of São Paulo

57 Ribeirão Preto, Brazil.  
58  
59 Department of Psychiatry  
60 University of Michigan Medical School  
61 Ann Arbor, Michigan  
62

63 Department of Psychiatry  
64 Federal University of São Paulo  
65 São Paulo, Brazil.  
66

67 Chromatox Laboratory Ltda  
68 São Paulo, Brazil  
69

## 70 **Study sponsors**

71 University of São Paulo  
72

## 73 **Financial support**

74 The São Paulo Research Foundation  
75 National Institute for Science and Technology – Translational Medicine, Brazil  
76

### 77 **1.1 Aim of study**

78  
79 Our primary aim is to investigate the safety and efficacy of Cannabidiol (CBD) as an  
80 intervention in reducing burnout symptoms in a group of front-line health professionals working  
81 with COVID-19 patients at the Ribeirão Preto Medical School University Hospital (RPMSUH) for  
82 four weeks.

83 Secondary aims are:

- 84 . Assess the level of stress and emotional overload of front-line health workers  
85 (physicians, nurses, and physiotherapists) during their performance in the  
86 pandemic caused by COVID-19.
- 87 . Assess whether the daily use of CBD 300 mg, for four weeks, reduces the level of  
88 stress, during the period of performance of professionals in the care of patients  
89 with COVID-19.
- 90 . Assess whether the daily use of CBD 300 mg, for four weeks, will modify  
91 inflammatory parameters, such as cytokines, measured from the serum of  
92 professionals in the care of patients with COVID-19.
- 93 . Assess whether the daily use of CBD 300 mg, for four weeks, prevents  
94 depression, burnout and Acute Stress Disorder and PTSD.
- 95 . Assess the possible adverse effects of using CBD.  
96

### 97 **1.2 Background of the study**

98  
99 The severe acute respiratory syndrome coronavirus 2 (SARS-CoV-2 or COVID-19)  
100 outbreak started in the Wuhan province in China in late December 2019. The World Health  
101 Organization (WHO) declared the disease as a pandemic on March 11, 2020. Since then, the  
102 pandemic has claimed more than two million lives worldwide. In this scenario, most countries  
103 adopted lockdown and physical distancing as containment strategies. This situation led to social  
104 isolation, decreased family and social support, and loneliness, which affected several aspects of  
105 our daily lives, including mental health.<sup>1-4</sup> Social isolation measures can induce or exacerbate  
106 mental health disorders since they are often associated with income loss, poverty, and limited  
107 access to essential services.

108 Since February 2020, several nationwide, large-scale surveys in the general population  
109 during the pandemic showed increases in moderate to severe emotional distress symptoms,  
110 depression, and anxiety,<sup>3-5-9</sup> post-traumatic stress disorder (PTSD),<sup>3,4,6,7,9,10</sup> and insomnia.<sup>3,4,7</sup>  
111 Depression, anxiety, insomnia, and emotional distress are especially prevalent among  
112 healthcare workers dealing with COVID-19 patients, such as physicians and nurses.<sup>2-5,11</sup> A  
113 recent meta-analysis of 13 cross-sectional studies (12 from China, one from Singapore; N =  
114 33062) assessing the mental health of healthcare workers estimated prevalence rates of 23.2%  
115 of anxiety, 38.9% of insomnia, and 22.8% of depression symptoms within this population.<sup>11</sup>

This gloomy scenario increases individual and social challenges and is expected to be accompanied by increases in other mental health problems, such as substance use disorders and suicide attempts.<sup>3,4</sup> Symptoms of emotional distress, depression, anxiety, and insomnia are usually treated with traditional antidepressants, anxiolytics, and hypnotics. However, these drugs often need several weeks to produce their therapeutic effects and have significant adverse effects. A safer and more effective drug to treat and prevent the manifestation and/or exacerbation of anxiety, depression, and other emotional exhaustion symptoms is highly desirable, especially during the current COVID-19 pandemic.

Cannabidiol (CBD) is a non-psychotomimetic phytocannabinoid with favorable safety and tolerability profiles shown to have anxiolytic effects in controlled trials with healthy volunteers<sup>12-15</sup> and adults<sup>16,17</sup> and teenagers<sup>18</sup> with social anxiety disorder. CBD doses in those studies ranged from single doses of 300–600 mg<sup>12-16</sup> to 300 mg daily for four weeks.<sup>18</sup> There is also evidence of antidepressant effects of CBD in preclinical studies.<sup>19,20</sup> Furthermore, preclinical studies showed that CBD has anti-inflammatory<sup>21-23</sup> and antiviral<sup>24</sup> properties. Indeed, CBD reversed the cytokine storm (reduced levels of interleukin-6, IL-6; tumor necrosis factor- $\alpha$ , TNF $\alpha$ ; and interferon- $\gamma$ , IFN $\gamma$  expression) and symptoms of acute respiratory distress syndrome (ARDS) very similar to those of severe COVID-19 in mice.<sup>21-22</sup> Moreover, CBD decreased the levels of pro-inflammatory cytokines (IL-4, IL-5, IL-6, IL-13) in a mice model of allergic asthma.<sup>23</sup> Besides the possible benefits of CBD on the viral load and cytokine storm induced by COVID-19, there is an association between distress/anxiety/depression and peripheral and central inflammatory processes. Thus, considering the anxiolytic, antidepressant, and anti-inflammatory properties of CBD and its good safety profile, we designed and conducted a single-site trial assessing the efficacy and safety of 300 mg CBD twice a day for four weeks in reducing symptoms of anxiety, depression, and emotional distress in front-line healthcare workers (physicians, nurses, and physical therapists) treating COVID-19 patients in a Brazilian hospital.

## 2. Methods

### 2.1 Design

The study will be a single-site, two-arm, parallel-group, participant and investigator unblinded, evaluator blinded, superiority trial of oral CBD 300 mg daily for 28 days to evaluate prevention or reduction of emotional distress in healthcare workers dealing with COVID-19 patients. After 28 days, the trial will include an open-label extension period where all participants will be offered treatment with CBD 300 mg for the same period of the original trial (28 days). Front-line healthcare workers (physicians, nurses, and physical therapists) working with COVID-19 patients at the Ribeirão Preto Medical School University Hospital (RPMSUH) will be invited to participate in the study. Volunteers will be randomized by block randomization with a 1:1 allocation ratio by a researcher who will not directly be involved with data collection to receive CBD for four weeks. This study will have two arms (described in table 1):

1. CBD 300 mg/daily plus General measures (supporting motivational videos, fitness videos);
2. General measures (supporting motivational videos, fitness videos) alone.

This study will follow the guidelines of the Consolidated Standards of Reporting Trials (CONSORT) statement.

| ARM                                                                                                                                                                                                                                                                                                                                                                                                                                                                                                                                                                                                                                                                       | INTERVENTION / TREATMENT                                                                                                                         |
|---------------------------------------------------------------------------------------------------------------------------------------------------------------------------------------------------------------------------------------------------------------------------------------------------------------------------------------------------------------------------------------------------------------------------------------------------------------------------------------------------------------------------------------------------------------------------------------------------------------------------------------------------------------------------|--------------------------------------------------------------------------------------------------------------------------------------------------|
| <p><b>Experimental: Cannabidiol plus general clinical supportive measures.</b></p> <p>The participants will receive CBD 300 mg/daily plus general measures (supporting motivational videos, fitness videos). All the participants will perform invasive and non-invasive procedures with the nursing team, the invasive being five blood collections, in their workplaces, to evaluate laboratory parameters, detailed in this project. The non-invasive ones refer to the measurement of height, weight, body temperature, and sleep pattern, as well as five collections of saliva, in a collecting tube, to assess viral load. They will also be monitored through</p> | <p>Drug: Cannabidiol<br/>Cannabidiol 300 mg daily for 4 weeks<br/>+<br/>General clinical supportive measures<br/>(days 0, 7, 14, 21, and 28)</p> |

|                                                                                                                                                                                                                                                                                                                                                                                                                                                                                                                                                                                                                                                                                                                                                                                                                                 |                                                                             |
|---------------------------------------------------------------------------------------------------------------------------------------------------------------------------------------------------------------------------------------------------------------------------------------------------------------------------------------------------------------------------------------------------------------------------------------------------------------------------------------------------------------------------------------------------------------------------------------------------------------------------------------------------------------------------------------------------------------------------------------------------------------------------------------------------------------------------------|-----------------------------------------------------------------------------|
| <p>weekly self-assessment scales, applied remotely, electronically (cell phones or computers), with an estimated duration of ten minutes each, which will have their responses recorded in an electronic database by the study coordination team.</p>                                                                                                                                                                                                                                                                                                                                                                                                                                                                                                                                                                           |                                                                             |
| <p><b>General clinical supportive measures</b></p> <p>The participants will receive general measures (supporting motivational videos, fitness videos) alone. All the participants will perform invasive and non-invasive procedures with the nursing team, the invasive being five blood collections, in their workplaces, to evaluate laboratory parameters, detailed in this project. The non-invasive ones refer to the measurement of height, weight, body temperature, and sleep pattern in a collecting tube to assess viral load. Also, they will be monitored through weekly self-assessment scales, applied remotely, electronically (cellphones or computers), with an estimated duration of ten minutes each, which will have their responses recorded in an electronic database by the study coordination team.</p> | <p>General clinical supportive measures<br/>(days 0, 7, 14, 21, and 28)</p> |

**Table 1: Study description - Groups and interventions.**

161  
162  
163  
164  
165  
166  
167  
168  
169  
170  
171  
172  
173  
174  
175  
176  
177  
178  
179  
180  
181  
182  
183  
184  
185  
186  
187  
188  
189  
190  
191  
192  
193  
194  
195  
196  
197  
198

**2.2 Volunteers**

Sample size: 120 patients  
Males & females  
24 to 60 years old

120 Front-line healthcare workers (physicians, nurses, and physical therapists) working with COVID-19 patients at the Ribeirão Preto Medical School University Hospital (RPMSUH) will be invited to participate in the study.

An initial meeting will be held at RPMSUH, for the presentation and discussion of the project, answering the doubts of eventual participants who will have the option to participate, considering the inclusion and exclusion criteria. Those who agree, and are able to participate in the study, will be invited to sign the Informed Consent Form.

After signing the informed consent form, during the study, the research participants will perform invasive and non-invasive procedures, with the invasive 5 blood samples being taken from their workplaces to assess laboratory parameters, detailed in this project. The non-invasive ones refer to the measurement of height, weight, body temperature, and sleep pattern, as well as five collections of saliva, in a collecting tube, to assess viral load. In addition to being monitored through weekly self-assessment scales, applied remotely, electronically (cell phones or computers), with an estimated duration of ten minutes each, which will have their responses recorded in an electronic database, by the coordination team of the study, and analyzed, for the compilation of data and evaluation of CBD efficacy and safety, by the physicians responsible for the study.

Those who are in the study arm which refers to the use of CBD receive the investigational product, at four weeks. The use of CBD at home will be guided by the pharmacy team of the research project. After the four-week period, if the CBD proves to be effective and well tolerated, there will be an expansion phase of the study, where the possibility of using cannabidiol will be offered to the other half of the participants. At the end of the fourth week of the study, after analyzing the results, the medical team together with each participant will decide whether or not to continue using the CBD.

If the product under investigation does NOT show tolerability and effectiveness, after the initial four weeks, the pharmacy team will collect the investigational product from the research participants, whether they are expanding or not, and the use of CBD will be suspended.

**2.2.1 Inclusion criteria**

1) Age between 24 and 60 years old;

- 199 2) Both sexes;  
200 3) HCFMRP physicians, nurses and physiotherapists involved in the care of patients  
201 who have undergone screening and present at least one symptom, which may be related to  
202 COVID-19 infection.  
203 4) Good health conditions and without conditions that characterize them as belonging to  
204 the risk groups associated with COVID infection19.  
205 5) Research participants with the potential to become pregnant may be included in the  
206 study if they are sexually abstinent or using a contraceptive method considered effective.  
207 6) Signing of the Free and Informed Consent Form (ICF) by the Research Ethics  
208 Committee (CEP) and CONEP.  
209

### 2.2.2 Exclusion criteria

- 210  
211 1) Using any medication with potential interaction with CBD or with a history of  
212 undesirable reactions prior to the use of this cannabinoid.  
213 2) Physicians, nurses and physiotherapists with occasional contact with patients with  
214 COVID-19 and who are not responsible for the continuous monitoring of these patients.  
215 3) Although in the RPMSUH care allocation policy, professionals who are eventually  
216 more susceptible to complications from the new coronavirus will be relocated to not attend  
217 patients with COVID19, it will be checked again to exclude patients with chronic diseases:  
218 diabetes, hypertension, lung disease like asthma or COPD; hematological diseases, chronic  
219 kidney disease and immunodepression.  
220 4) Professionals over 60 years old  
221 5) Female research participants who become pregnant or male participants who have  
222 their pregnant partner during the research project  
223

### 2.3 Outcome Measures

#### Primary Outcome Measure:

- 224  
225 1. MBI-EE: Abbreviated Maslach Burnout Inventory - Human Services Survey [Time  
226 Frame: Through study completion, over time during the study period (day 0-28)]  
227 To assess the emotional exhaustion dimension of the burnout syndrome, based on nine  
228 items, scored from 0 ("never") to 6 ("every day")  
229

#### Secondary Outcome Measures:

- 230  
231 1. Brief measure for assessing generalized anxiety disorder: The GAD-7 [Time Frame:  
232 Through study completion, over time during the study period (day 0-28)]  
233 Brief measure for assessing generalized anxiety disorder.  
234  
235 2. PHQ-9: Patient's Health Questionnaire-9 [Time Frame: Through study completion,  
236 over time during the study period (day 0-28)]  
237 Evaluate depressive symptoms o  
238  
239 3. Change in proinflammatory cytokine concentration [Time Frame: Through study  
240 completion, over time during the study period (day 0-28)]  
241 Laboratory parameters, including the change in proinflammatory cytokine  
242 concentrations.  
243  
244 4. Number of participants with treatment-related adverse events as assessed by  
245 CTCAEv5.0 [Time Frame: Through study completion, over time during the study period (day 0-  
246 28)]  
247 Occurrence of side effects  
248  
249 5. Posttraumatic Stress Disorder Checklist for DSM-5 (PCL-5) [Time Frame: Through  
250 study completion, over time during the study period (day 0-28)]  
251 It is a self-report measure widely used to assess PTSD symptoms, according to  
252 the DSM-5 criteria. The reduced version of this instrument will be used (8 items)  
253  
254 6. Samples for blood tests  
255 . Full hemogram;  
256 . Sodium/potassium;  
257 . Urea;  
258

- 259 . Creatinine;
- 260 . Total bilirubin;
- 261 . Oxalacetic transaminase;
- 262 . Pyruvic transaminase;
- 263 . Gamma-glutamyltransferase;
- 264 . Alkaline phosphatase;
- 265 . Glucose;
- 266 . Lipidogram;
- 267 . Thyroid-stimulating hormone;
- 268 . Testosterone;
- 269 . Cortisol;
- 270 . Estrogen;
- 271 . Progesterone;
- 272 . Proinflammatory cytokines (IL-10, TNF $\alpha$ )
- 273 . Plasma levels of CBD.

274

275

### 3. Drug

276

Cannabidiol 99.6% purity, supplied by PurMed Global (Palm Beach, Florida, USA), dissolved in medium-chain triglyceride (MCT) oil with a concentration of 150 mg/mL. Daily administration will be 300 mg CBD (1 mL or 150 mg per dose, twice a day) for four weeks. The bottles containing the product under investigation will be weighed before delivery to the research participant and at the time of returning the bottles, which must be retained with the research participant, so that it is possible to calculate adherence to the pharmacological treatment and registration in form.

282

283

284

### 4. Analysis of results

285

The collected data will be automatically archived on the platform and then exported to the SSPS Software for analysis.

287

The clinical and demographic data of the participants, who did or did not use CBD, will be compared using the T test for continuous data and the chi-square test for nominal data.

288

289

The total scores of the scales: MBI-EE, PCL-5, PHQ-9, GAD-7, CGI-S, will be subjected to Analysis of Variance of repeated measures (ANOVAmr). The data from the UKU / CARE scale and laboratory tests will be presented descriptively.

291

292

The statistical analysis will be performed with the aid of the Statistical Package for the Social Sciences (SPSS) v.22.0 software produced by Statistical Product and Service Solutions Incorporation ([www.spss.com.br](http://www.spss.com.br)).

294

295

296

### 5. Ethical aspects

297

Health professionals assigned to care for patients with COVID-19 will be invited to participate in the research, this participation being absolutely voluntary. The subject will be assured at the time of the invitation, that there will be complete freedom to withdraw their consent at any time during the course of the research and to stop participating in the study without causing any harm.

301

302

All volunteers will have access to the consent form and the clarification of all their doubts. Only subjects who sign the free and informed consent form will be accepted in the study. The right to receive information and clarifications regarding any questions that arise during the procedure and updated information about the study will be guaranteed, even though this may affect your willingness to continue participating. Similarly, the security of not being identified will be guaranteed, as well as that all information provided by them will be kept confidential.

308

309

The cannabinoid substance to be used (CBD) is devoid of the typical psychological effects of Cannabis sativa.<sup>25</sup> CBD is a safe compound when administered to humans in a wide dosage range, both in acute administration, orally and in chronic administration<sup>26, 27</sup>.

311

312

The CBD had its classification changed by Brazilian Health Regulatory Agency (Anvisa), changing from a banned drug to a drug for controlled use. In December 2014, the Federal Council of Medicine authorized the prescription of CBD, in special situations. In human research, this compound has been extensively tested.

315

316

317

318

319  
 320  
 321  
 322  
 323  
 324  
 325  
 326  
 327  
 328

**6. Schedule**

| Activities                                                   | Apr/20 | May/20 | Jun/20 | Jul/20 | Aug/20 | Sep/20 | Oct/20 | Nov/20 | Dec/20 | Jan/21 |
|--------------------------------------------------------------|--------|--------|--------|--------|--------|--------|--------|--------|--------|--------|
| Submission of the Protocol and documents to ethical entities | x      |        |        |        |        |        |        |        |        |        |
| Sending medication to the Center                             | x      |        |        |        |        |        |        |        |        |        |
| Training of the Center involved in the Protocol              | x      |        |        |        |        |        |        |        |        |        |
| Patient Recruitment and Selection                            | x      | x      | x      | x      | x      | x      |        |        |        |        |
| Conducting the Clinical Trial                                | x      | x      | x      | x      | x      | x      | x      | x      |        |        |
| Preparation of Final Reports                                 | x      | x      | x      | x      | x      | x      | x      | x      | x      | x      |
| Preparation of the scientific article                        | x      | x      | x      | x      | x      | x      | x      | x      | x      | x      |

329  
 330  
 331  
 332  
 333  
 334  
 335  
 336  
 337  
 338  
 339  
 340  
 341  
 342

**7. Added value of this research**

To our knowledge, this is the first investigation of the safety and efficacy of CBD as a prevention treatment for burnout symptoms and other mental health problems in front-line health professionals treating COVID-19 patients.

**8. Implications of all the available evidence**

The results of this study may collaborate to prevent enormous emotional distress and psychological and mental health consequences already observed in professionals who work in chronic and continuous stress situations, now in particular in the context of the current Pandemic by CoronaVirus-19. Since these professionals are a precious group in the treatment of the population, if these potential individual benefits are observed, we imagine that this will be extended indirectly to social aspects and, consequently, to the health of the whole society.

343  
344  
345  
346  
347  
348  
349  
350  
351  
352  
353  
354  
355  
356  
357  
358  
359  
360  
361  
362  
363  
364  
365  
366  
367  
368  
369  
370  
371  
372  
373  
374  
375  
376  
377  
378  
379  
380  
381  
382  
383  
384  
385  
386  
387  
388  
389  
390  
391  
392  
393  
394  
395  
396  
397  
398  
399  
400

## 9. References

1. Brooks SK, Webster RK, Smith LE, et al. The psychological impact of quarantine and how to reduce it: rapid review of the evidence. *Lancet*. 2020;395(10227):912-920. doi:10.1016/S0140-6736(20)30460-8
2. Xiang YT, Yang Y, Li W, et al. Timely mental health care for the 2019 novel coronavirus outbreak is urgently needed. *Lancet Psychiatry*. 2020;7(3):228-229. doi:10.1016/S2215-0366(20)30046-8
3. Moreno C, Wykes T, Galderisi S, et al. How mental health care should change as a consequence of the COVID-19 pandemic. *Lancet Psychiatry*. 2020;7(9):813-824. doi:10.1016/S2215-0366(20)30307-2
4. Simon NM, Saxe GN, Marmar CR. Mental Health Disorders Related to COVID-19-Related Deaths. *JAMA*. 2020;324(15):1493-1494. doi:10.1001/jama.2020.19632
5. Iob E, Frank P, Steptoe A, Fancourt D. Levels of Severity of Depressive Symptoms Among At-Risk Groups in the UK During the COVID-19 Pandemic. *JAMA Netw Open*. 2020;3(10):e2026064. Published 2020 Oct 1. doi:10.1001/jamanetworkopen.2020.26064
6. González-Sanguino C, Ausín B, Castellanos MÁ, et al. Mental health consequences during the initial stage of the 2020 Coronavirus pandemic (COVID-19) in Spain. *Brain Behav Immun*. 2020;87:172-176. doi:10.1016/j.bbi.2020.05.040
7. Ren Y, Zhou Y, Qian W, et al. Letter to the Editor "A longitudinal study on the mental health of general population during the COVID-19 epidemic in China". *Brain Behav Immun*. 2020;87:132-133. doi:10.1016/j.bbi.2020.05.004
8. Qiu J, Shen B, Zhao M, Wang Z, Xie B, Xu Y. A nationwide survey of psychological distress among Chinese people in the COVID-19 epidemic: implications and policy recommendations [published correction appears in *Gen Psychiatr*. 2020 Apr 27;33(2):e100213corr1]. *Gen Psychiatr*. 2020;33(2):e100213. Published 2020 Mar 6. doi:10.1136/gpsych-2020-100213
9. Wang C, Pan R, Wan X, et al. Immediate Psychological Responses and Associated Factors during the Initial Stage of the 2019 Coronavirus Disease (COVID-19) Epidemic among the General Population in China. *Int J Environ Res Public Health*. 2020;17(5):1729. Published 2020 Mar 6. doi:10.3390/ijerph17051729
10. Tang W, Hu T, Hu B, et al. Prevalence and correlates of PTSD and depressive symptoms one month after the outbreak of the COVID-19 epidemic in a sample of home-quarantined Chinese university students. *J Affect Disord*. 2020;274:1-7. doi:10.1016/j.jad.2020.05.009
11. Pappa S, Ntella V, Giannakas T, Giannakoulis VG, Papoutsis E, Katsaounou P. Prevalence of depression, anxiety, and insomnia among healthcare workers during the COVID-19 pandemic: A systematic review and meta-analysis [published correction appears in *Brain Behav Immun*. 2021 Feb;92:245]. *Brain Behav Immun*. 2020;88:901-907. doi:10.1016/j.bbi.2020.05.026
12. Zuardi AW, Cosme RA, Graeff FG, Guimarães FS. Effects of ipsapirone and cannabidiol on human experimental anxiety. *J Psychopharmacol*. 1993;7(1 Suppl):82-88. doi:10.1177/026988119300700112
13. Crippa JA, Zuardi AW, Garrido GE, et al. Effects of cannabidiol (CBD) on regional cerebral blood flow. *Neuropsychopharmacology*. 2004;29(2):417-426. doi:10.1038/sj.npp.1300340
14. Zuardi AW, Rodrigues NP, Silva AL, et al. Inverted U-Shaped Dose-Response Curve of the Anxiolytic Effect of Cannabidiol during Public Speaking in Real Life. *Front Pharmacol*. 2017;8:259. Published 2017 May 11. doi:10.3389/fphar.2017.00259
15. Linares IM, Zuardi AW, Pereira LC, et al. Cannabidiol presents an inverted U-shaped dose-response curve in a simulated public speaking test. *Braz J Psychiatry*. 2019;41(1):9-14. doi:10.1590/1516-4446-2017-0015



- 401 16. Crippa JA, Derenusson GN, Ferrari TB, et al. Neural basis of anxiolytic effects of  
402 cannabidiol (CBD) in generalized social anxiety disorder: a preliminary report. *J*  
403 *Psychopharmacol.* 2011;25(1):121-130. doi:10.1177/0269881110379283
- 404 17. Bergamaschi MM, Queiroz RH, Chagas MH, et al. Cannabidiol reduces the anxiety induced  
405 by simulated public speaking in treatment-naïve social phobia  
406 patients. *Neuropsychopharmacology.* 2011;36(6):1219-1226. doi:10.1038/npp.2011.6
- 407 18. Masataka N. Anxiolytic Effects of Repeated Cannabidiol Treatment in Teenagers With  
408 Social Anxiety Disorders. *Front Psychol.* 2019;10:2466. Published 2019 Nov 8.  
409 doi:10.3389/fpsyg.2019.02466
- 410 19. Zanelati TV, Biojone C, Moreira FA, Guimarães FS, Joca SR. Antidepressant-like effects of  
411 cannabidiol in mice: possible involvement of 5-HT1A receptors. *Br J Pharmacol.*  
412 2010;159(1):122-128. doi:10.1111/j.1476-5381.2009.00521.x
- 413 20. Silote GP, Sartim A, Sales A, et al. Emerging evidence for the antidepressant effect of  
414 cannabidiol and the underlying molecular mechanisms. *J Chem Neuroanat.* 2019;98:104-  
415 116. doi:10.1016/j.jchemneu.2019.04.006
- 416 21. Khodadadi H, Salles ÉL, Jarrahi A, et al. Cannabidiol Modulates Cytokine Storm in Acute  
417 Respiratory Distress Syndrome Induced by Simulated Viral Infection Using Synthetic  
418 RNA. *Cannabis Cannabinoid Res.* 2020;5(3):197-201. Published 2020 Sep 2.  
419 doi:10.1089/can.2020.0043
- 420 22. Salles ÉL, Khodadadi H, Jarrahi A, et al. Cannabidiol (CBD) modulation of apelin in acute  
421 respiratory distress syndrome. *J Cell Mol Med.* 2020;24(21):12869-12872.  
422 doi:10.1111/jcmm.15883
- 423 23. Vuolo F, Abreu SC, Michels M, et al. Cannabidiol reduces airway inflammation and fibrosis  
424 in experimental allergic asthma. *Eur J Pharmacol.* 2019;843:251-259.  
425 doi:10.1016/j.ejphar.2018.11.029
- 426 24. Mabou Tagne A, Pacchetti B, Sodergren M, Cosentino M, Marino F. Cannabidiol for Viral  
427 Diseases: Hype or Hope?. *Cannabis Cannabinoid Res.* 2020;5(2):121-131. Published 2020  
428 Jun 5. doi:10.1089/can.2019.0060
- 429 25. Zuardi AW, Shirakawa I, Finkelfarb E, Karniol IG. Action of cannabidiol on the anxiety and  
430 other effects produced by delta 9-THC in normal subjects. *Psychopharmacology (Berl).*  
431 1982;76(3):245-250. doi:10.1007/BF00432554
- 432 26. Bergamaschi MM, Queiroz RH, Zuardi AW, Crippa JA. Safety and side effects of  
433 cannabidiol, a Cannabis sativa constituent. *Curr Drug Saf.* 2011;6(4):237-249.  
434 doi:10.2174/157488611798280924
- 435 27. Iffland K, Grotenhermen F. An Update on Safety and Side Effects of Cannabidiol: A Review  
436 of Clinical Data and Relevant Animal Studies. *Cannabis Cannabinoid Res.* 2017;2(1):139-  
437 154. Published 2017 Jun 1. doi:10.1089/can.2016.0034
- 438  
439  
440  
441  
442  
443  
444  
445  
446  
447  
448  
449  
450  
451  
452  
453  
454  
455  
456  
457  
458  
459

460  
461
