# Supplementary material for: Efficacy and Safety of Cannabidiol Plus Standard Care vs Standard Care Alone for the Treatment of Emotional Exhaustion and Burnout Among Frontline Health Care Workers During the COVID-19 Pandemic: A Randomized Clinical Trial
Source: PubMed Central journal article supplement (PMC8363917; doi:10.1001/jamanetworkopen.2021.20603), 2021-08-13
Supplement: jamanetwopen-e2120603-s003.pdf [file jamanetwopen-e2120603-s003.pdf]

\*Indicates required information. Only first name, last name, and suffix will appear in PubMed.

| <b>*Group Name(s):</b> Burnout and Distress Prevention With Cannabidiol in Front-line Health Care Workers Dealing With COVID-19 (BONSAI) Trial |                   |                              |                  |                                                                                    |                                          |                                                         |                                                                                            |
|------------------------------------------------------------------------------------------------------------------------------------------------|-------------------|------------------------------|------------------|------------------------------------------------------------------------------------|------------------------------------------|---------------------------------------------------------|--------------------------------------------------------------------------------------------|
| Investigators                                                                                                                                  |                   |                              |                  |                                                                                    |                                          |                                                         |                                                                                            |
| <b>*First Name and Middle Initial(s)</b>                                                                                                       | <b>*Last Name</b> | <b>*Suffix (eg, Jr, III)</b> | Academic Degrees | Institution                                                                        | Location (city, state/province, country) | Role or Contribution, eg, chair, principal investigator | Group (if more than 1 Group listed in the byline) and/or Subgroup (eg, Steering Committee) |
| Debora C.                                                                                                                                      | Litcanov          | PD                           | Pharmacist       | Faculdade de Ciências Farmacêuticas de Ribeirão Preto da Universidade de São Paulo | Ribeirão Preto, São Paulo/Brasil         | Coordinator assistant                                   |                                                                                            |
| Leonardo                                                                                                                                       | Rodrigues         | PD                           | Pharmacist       | Faculdade de Ciências Farmacêuticas de Ribeirão Preto da Universidade de São Paulo | Ribeirão Preto, São Paulo/Brasil         | Coordinator assistant                                   |                                                                                            |
| Thiago F.                                                                                                                                      | Alves             | PD                           | Pharmacist       | Faculdade de Ciências Farmacêuticas de Ribeirão Preto da Universidade de São Paulo | Ribeirão Preto, São Paulo/Brasil         | Coordinator assistant                                   |                                                                                            |
| Bárbara M.                                                                                                                                     | Coutinho          | PD                           | Pharmacist       | Faculdade de Ciências Farmacêuticas de Ribeirão Preto da Universidade de São Paulo | Ribeirão Preto, São Paulo/Brasil         | Pharmacist                                              |                                                                                            |
