# Supplementary material for: Efficacy and Safety of Cannabidiol Plus Standard Care vs Standard Care Alone for the Treatment of Emotional Exhaustion and Burnout Among Frontline Health Care Workers During the COVID-19 Pandemic: A Randomized Clinical Trial
Source: PubMed Central journal article supplement (PMC8363917; doi:10.1001/jamanetworkopen.2021.20603), 2021-08-13
Supplement: jamanetwopen-e2120603-s004.pdf [file jamanetwopen-e2120603-s004.pdf]

# Data Sharing Statement

Crippa. Efficacy and Safety of Cannabidiol Plus Standard Care vs Standard Care Alone for the Treatment of Emotional Exhaustion and Burnout Among Frontline Health Care Workers During the COVID-19 Pandemic. *JAMA Netw Open*. Published August 13, 2021.  
doi:10.1001/jamanetworkopen.2021.20603

## Data

**Data available:** Yes

**Data types:** Deidentified participant data

**How to access data:** Request for data must be sent to Prof Antonio Zuardi [awzuardi@fmrp.usp.br](mailto:awzuardi@fmrp.usp.br)

**When available:** With publication

## Supporting Documents

**Document types:** Statistical/analytic code

**How to access documents:** Request for data must be sent to Prof Antonio Zuardi [awzuardi@fmrp.usp.br](mailto:awzuardi@fmrp.usp.br)

**When available:** With publication

## Additional Information

**Who can access the data:** Request for data must be sent to Prof Antonio Zuardi [awzuardi@fmrp.usp.br](mailto:awzuardi@fmrp.usp.br)

**Types of analyses:** For metaanalysis studies

**Mechanisms of data availability:** With investigator support, after approval of the proposal, and with a signed data access agreement. Moreover, the protocol must be accepted by both the local Ethical Committes
